# Supplementary material
Source: publisher figshare collection journal article supplement (https://gsajournals.figshare.com/ndownloader/files/15078329)
Supplement: Supplementary file 1 [file 15078329]

SUPPLEMENTAL FILE LIST

Figure S1: Fks1-GFP and GFP Rho1 localization is not altered during caspofungin treatment.

Table S1: List of all *Cryptococcus neoformans* strains used in this study.

Table S2: List of all primers used in this study.

Table S3: List of all plasmids engineered and used in this study.

Table S4: Biological Process GO Term analysis of caspofungin sensitivity screen hits

Table S5:List of SNPs and other mutations identified through whole-genome sequencing of the *msh1*Δ mutant.

Table S6: Cna1 target mutant MICs
